# Supplementary material for: Lipoprotein particle alterations due to androgen therapy in individuals with dyskeratosis congenita
Source: PubMed Central journal article supplement — eBioMedicine. 2021 Dec 17;75:103760. doi: 10.1016/j.ebiom.2021.103760 (PMC8693311; doi:10.1016/j.ebiom.2021.103760), 2021-12-17
Supplement: mmc3.pdf [file mmc3.pdf]

**Subject:** RE: Permission to acknowledge you in EBIOM-D-21-02319R1  
**Date:** Monday, November 29, 2021 at 9:02:03 AM Eastern Standard Time  
**From:** Maureen Risch  
**To:** Savage, Sharon (NIH/NCI) [E], Lisa Leathwood  
**CC:** Thompson, Mone't (NIH/NCI) [F]

You have my consent to list me in the acknowledgement section of the manuscript.

Maureen

---

**From:** Savage, Sharon (NIH/NCI) [E] <savagesh@mail.nih.gov>  
**Sent:** Wednesday, November 24, 2021 4:33 PM  
**To:** Lisa Leathwood <LisaLeathwood@westat.com>; Maureen Risch <MaureenRisch@westat.com>  
**Cc:** Thompson, Mone't (NIH/NCI) [F] <mone't.thompson@nih.gov>  
**Subject:** Permission to acknowledge you in EBIOM-D-21-02319R1

**CAUTION: External Email \***

Lisa and Maureen,

We would like to acknowledge your contributions to our manuscript titled ""Lipoprotein particle alterations due to androgen therapy in individuals with dyskeratosis congenita." It is currently under review at EBioMedicine and the submitted manuscript is attached, FYI.

The editor has asked us to confirm your consent to having your names and affiliations recognized in the Acknowledgement section of the manuscript. Please respond to this email accordingly.

Thank you,  
Sharon

**Sharon A. Savage, M.D.** | Chief, [Clinical Genetics Branch](#)  
Clinical Director, [Division of Cancer Epidemiology and Genetics](#)  
(*pronouns: she, her, hers - why?*)  
[National Cancer Institute](#), 9609 Medical Center Dr., Rm. 6E456, MSC 9772  
Bethesda, MD 20892-9772 (use Rockville, MD 20850 for FED-EX/UPS/Couriers)  
Tel: 240-276-7252. Fax: 240-276-7836. Email: [savagesh@mail.nih.gov](mailto:savagesh@mail.nih.gov)

\* Please use caution when responding and/or clicking on links as this email originated from outside of Westat.
